# Supplementary material for: Severe Dengue in Adults Admitted to Intensive Care Units on Réunion Island: Clinical Spectrum, Outcomes, and Predictors of Mortality
Source: Research Square preprint supplement (doi:10.21203/rs.3.rs-7959639/v1), 2025-11-11

**Definition of organs failure**

**Hypovolemic shock : Hypovolemic shock is an acute circulatory failure caused by a loss of intravascular volume, typically due to hemorrhage or severe dehydration, resulting in insufficient tissue perfusion (21).**

**Distributive shock :** Distributive shock is characterized by **excessive vasodilation and abnormal blood flow distribution,** often seen in septic, anaphylactic, systemic inflammatory response syndrome, or neurogenic shock, despite normal or elevated cardiac output (21).

**Cardiogenic shock** : Cardiogenic shock results from the **heart’s inability to generate adequate cardiac output** to meet the body’s metabolic demands, commonly secondary to acute myocardial infarction or acute heart failure (21).

**Hemorrhage :** acute loss of blood, either internal or external, resulting from vascular injury. It is considered severe or massive when blood loss exceeds 20% of total blood volume or when perfusion of vital organs is compromised (22).

**Respiratory Distress : c**ondition in which a patient exhibits increased respiratory effort (e.g., tachypnea, use of accessory muscles, nasal flaring, inter-costal retractions) and is unable to maintain adequate gas exchange, leading to signs of hypoxia and/or hypercapnia (23).

**Acute Kidney Injury** (AKI) is **defined by at least one** of the following criteria (24):

1. **Increase in serum creatinine (SCr)** by ≥ 0.3 mg/dL (≥ 26.5 µmol/L) within 48 hours, or
2. **Increase in SCr to ≥ 1.5 times baseline**, which is known or presumed to have occurred within the prior 7 days;or
3. **Urine volume < 0.5 mL/kg/h for 6 hours.**


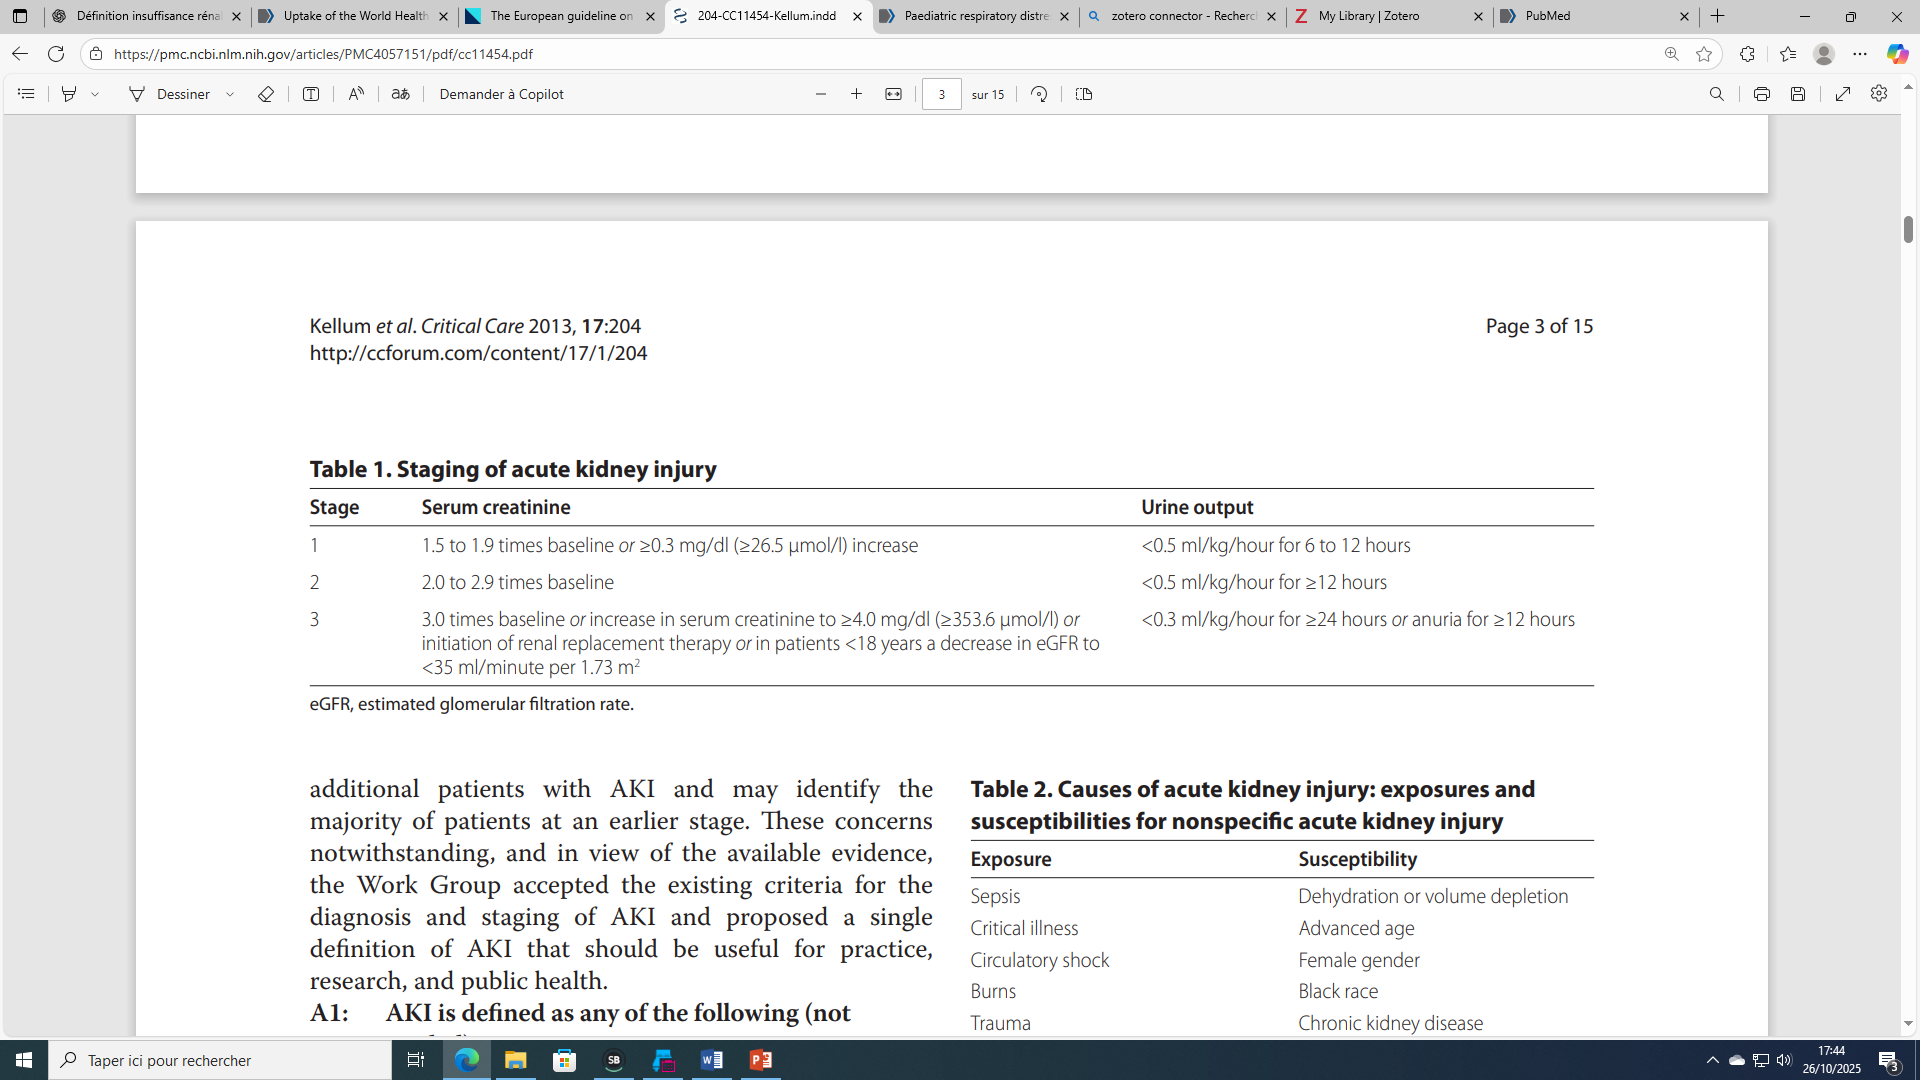

Supplement: Supplementary file 1 [file 70152553ad1677c72a5a089a.docx]
