# Supplementary material for: Severe Dengue in Adults Admitted to Intensive Care Units on Réunion Island: Clinical Spectrum, Outcomes, and Predictors of Mortality
Source: Research Square preprint supplement (doi:10.21203/rs.3.rs-7959639/v1), 2025-11-11
Supplement: Supplementary file 1 [file a2904c7e532428ac1172bb80.pdf]

## INFORMATION NOTE

### FOR THE PATIENT

Please read this document carefully.

You can then decide whether or not you wish to oppose the use of your existing samples and health data available in your medical record.

PROJECT TITLE: Severe Dengue in Adults Admitted to Intensive Care Units on Réunion Island: Clinical Spectrum, Outcomes, and Predictors of Mortality

Name and address of the Sponsor: University Hospital of La Réunion, Félix Guyon Site, Allée des Topazes, CS 11021, 97400 Saint-Denis.

Research Center: University Hospital of La Réunion, Félix Guyon Site, Allée des Topazes, CS 11021, 97400 Saint-Denis.

Dear Sir or Madam,

Dengue is a virus transmitted by mosquitoes, particularly the tiger mosquito in Réunion Island. Several epidemics have occurred on the island, and according to the WHO, due to global warming and increasing international exchanges, dengue fever is likely to become a major threat to the global population in the coming years, especially in tropical regions favorable to mosquito development.

Dengue can cause particularly severe cases requiring hospitalization in an intensive care unit (ICU). A few studies have been conducted on severe dengue, including in Réunion Island, but none have specifically studied patients admitted to intensive care.

In order to improve knowledge on severe dengue cases in ICU at Réunion Island, the multidisciplinary intensive care unit of the University Hospital of La Réunion has initiated an observational clinical research project to describe the characteristics of severe dengue cases admitted to intensive care.

You were previously hospitalized in intensive care for severe dengue. Therefore, Dr. Nicolas ALLOU, Dr. Charles VIDAL, and Dr. Quentin SOUPIN would like to use the health data available in your medical record related to this infection. No additional blood samples will be collected. This study is purely observational and does not alter your medical care in any way.

Your participation in this research is voluntary. If you do not wish to participate, you do not need to provide any justification. This will have no impact on your medical care or your relationship with your doctor

### What is the objective of this research?

This retrospective study concerns adult patients who were hospitalized in the multidisciplinary ICU for severe dengue at Réunion Island. The aim is to collect epidemiological data on this infection to identify the characteristics of severe dengue cases in intensive care and to improve diagnostic and therapeutic management.

### What data are required for this research?

The research requires the collection of clinical and paraclinical data related to your hospitalization. The collected data will be de-identified and coded to preserve your anonymity.

### How will my data be processed?

As part of this non-interventional research, in which the University Hospital of La Réunion wishes to use your health data, your personal data will be processed to allow analysis of the study results in accordance with its stated objective, under conditions ensuring confidentiality.

To this end, your medical data—including information related to your hospitalization and medical history—will be collected from your medical record and fully de-identified (no name, surname, or date of birth) before being entered into a computerized database with a code number. All data collected for this research will be analyzed.

All information concerning you that is useful for the study and available in your medical record may be accessed by professionals bound by medical confidentiality who are collaborating in this research.

### What are my rights?

Your participation in this study is voluntary. You are entirely free to participate or not. In accordance with the French Data Protection Act of January 6, 1978, as amended, you have the right to access and rectify your personal data. You also have the right to object to the transmission and use of confidential data as part of this research. You may exercise this right without providing justification, and it will not affect your medical care or your relationship with your physician.

The overall results of the research may be communicated to you by Dr. Nicolas ALLOU, Dr. Charles VIDAL, or Dr. Quentin SOUPIN upon request. You can exercise these rights by writing to:

Dr. Nicolas ALLOU / Dr. Charles VIDAL ;  
Department of Intensive Care  
University Hospital Félix Guyon Allée des Topazes, 97400, La Réunion

You may also access, either directly or through a physician of your choice, all your medical data in accordance with Article L1111-7 of the French Public Health Code. If we do not receive a response from you within one month of the date of this information notice, the health data available in your medical record and your samples will be used for this research.

If you have any questions or would like further information, please contact:

Dr. Nicolas ALLOU / Dr. Charles VIDAL

Department of Intensive Care

University Hospital Félix Guyon Allée des Topazes, 97400, La Réunion

[nicolas.allou@hotmail.fr](mailto:nicolas.allou@hotmail.fr), [charles.vidal@chu-reunion.fr](mailto:charles.vidal@chu-reunion.fr)
