# Supplementary material for: Severe Dengue in Adults Admitted to Intensive Care Units on Réunion Island: Clinical Spectrum, Outcomes, and Predictors of Mortality
Source: Research Square preprint supplement (doi:10.21203/rs.3.rs-7959639/v1), 2025-11-11
Supplement: Supplementary file 2 [file a91d1839970fb2ef2cf281d8.pdf]

## AVIS FAVORABLE & publication scientifique

Etude épidémiologique sur les dengues graves en réanimation polyvalente du CHU de la Réunion 2017-2023 [DENGUERE].

Chère Madame, Cher Monsieur,

Le **Comité d'Éthique** de la **Recherche** du **Centre Ethique et Recherche en Santé de Bordeaux** a procédé à l'analyse du **projet de recherche en objet**, sur la base des pièces suivantes :

| DOCUMENTS de l'étude par ordre alphabétique                                | DATES version ou mail |
|----------------------------------------------------------------------------|-----------------------|
| Déclaration au DPO pour inscription au Registre de Traitement des Données  | 26.03.2025            |
| Déclaration des liens d'intérêts                                           | 31.03.2025            |
| Note d'information spécifique et de non-opposition des personnes_v1.0_v2.0 | 26.03.2025_18.04.2025 |
| Recueil des données                                                        | 04.03.2025            |
| Protocole_v1.0                                                             | 04.03.2025            |

Le CER **confirme** que :

**cette étude n'appartient pas au champ des Recherches Impliquant la Personne Humaine** défini aux articles L. 1121-1 et R. 1121-1 du Code de la Santé Publique.

Il n'y a donc pas d'impératif de soumission préalable à un Comité de Protection des Personnes.

Il s'agit d'une **étude rétrospective multicentrique**, basée sur l'utilisation de données issues du soin courant, à visée de recherche.

Les personnes sont informées de l'utilisation secondaire de leurs données de soin à visée de recherche, par une note d'information spécifique.

---

**Sur la base des informations disponibles**, le CER **confirme** :

que **cette étude remplit les exigences éthiques et réglementaires en vigueur.**

Cet **avis éthique** référencé **CER-BDX 2025-137**

**peut être utilisé** par les soignants chercheurs **au titre d'avis éthique**,

**lors du processus de soumission pour publication** à une revue scientifique.

---

Nous restons à votre disposition

et vous prions d'agréer, Chère Madame, Cher Monsieur, nos sincères salutations.

Pour le Centre Ethique et Recherche en Santé de Bordeaux



**Pr Thibaud HAASER**  
Directeur
